# Supplementary material for: Understanding barriers to optimal medication management for those requiring long-term dialysis: rationale and design for an observational study, and a quantitative description of study variables and data
Source: Springer Nature journal article supplement (doi:10.1186/s12882-015-0097-2), 2015-07-10
Supplement: MOESM1 [file 9741692]

1. Date of dialysis inception

--/--/----

2. Current modality of dialysis (single option)

Facility HD

Home HD

PD

3. Current age-adjusted Charlson Co-morbidity Index<sup>1,2</sup>

\_\_\_\_\_

4. Current NZDep score

\_\_\_\_\_

5. Current medical comorbidity (multiple options)

Diabetes Mellitus

Coronary artery  
disease

Cerebrovascular  
disease

Peripheral vascular  
disease

Lung disease

---

<sup>1</sup> Charlson ME, Pompei P, Ales KL, MacKenzie CR: **A new method of classifying prognostic comorbidity in longitudinal studies: development and validation.** *J Chronic Dis* 1987, **40**(5):373-383.

<sup>2</sup> Hall WH, Ramachandran R, Narayan S, Jani AB, Vijayakumar S: **An electronic application for rapidly calculating Charlson comorbidity score.** *BMC Cancer* 2004, **4**:94
